# Supplementary material for: 2′-fluoro-modified pyrimidines enhance affinity of RNA oligonucleotides to HIV-1 reverse transcriptase
Source: PubMed Central journal article supplement — RNA. 2020 Nov;26(11):1667–79. doi: 10.1261/rna.077008.120 (PMC7566575; doi:10.1261/rna.077008.120), 2020-11
Supplement: supp_077008.120_Supplemental_Fig_S2.pdf [file supp_077008.120_Supplemental_Fig_S2.pdf]

**Figure S2**

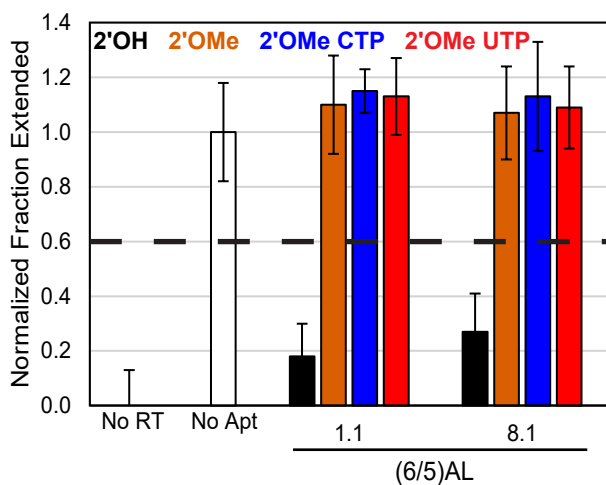

**Figure S2. Effect of Single 2'-OMe-Pyrimidine Modification on RT inhibition by (6/5)AL Aptamers.** Two (6/5)AL aptamers (70N 1.1 and 70N 8.1) were transcribed in reactions in which only 2'-OMe-modified CTP (blue) or only 2'-OMe-modified UTP (red) replaced the normal NTP, and these RNAs were evaluated for RT inhibition in primer extension assays (n = 4). Primer extension assay results using aptamers transcribed with both pyrimidines supplied as 2'-OH (black) or as 2'-OMe (orange) were plotted for comparison. Loss of RT inhibition with either substitution indicates that at least one C and at least one U must retain 2'-OH in order for these aptamers to inhibit RT.
