# Supplementary material for: 2′-fluoro-modified pyrimidines enhance affinity of RNA oligonucleotides to HIV-1 reverse transcriptase
Source: PubMed Central journal article supplement — RNA. 2020 Nov;26(11):1667–79. doi: 10.1261/rna.077008.120 (PMC7566575; doi:10.1261/rna.077008.120), 2020-11
Supplement: supp_077008.120_Supplemental_Fig_S4.pdf [file supp_077008.120_Supplemental_Fig_S4.pdf]

**Figure S4**

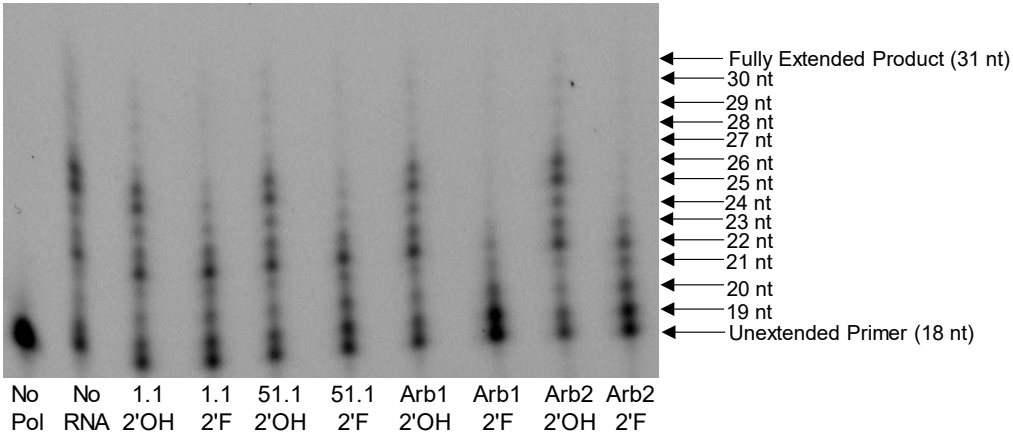

**Figure S4. Representative Primer Extension Gel for Human Polymerase Beta.** Primer extension by hPolβ in the presence of the 2'-OH or 2'-FY RNA sequences labeled below each lane was quantified to determine the mean number of nucleotides incorporated (n=4). The bands corresponding to the unextended primer (18 nt), fully extended product (31 nt), and intermediate products are annotated on the gel.
