# Supplementary material for: 2′-fluoro-modified pyrimidines enhance affinity of RNA oligonucleotides to HIV-1 reverse transcriptase
Source: PubMed Central journal article supplement — RNA. 2020 Nov;26(11):1667–79. doi: 10.1261/rna.077008.120 (PMC7566575; doi:10.1261/rna.077008.120), 2020-11
Supplement: supp_077008.120_Supplemental_Fig_S5.pdf [file supp_077008.120_Supplemental_Fig_S5.pdf]

**Figure S5**

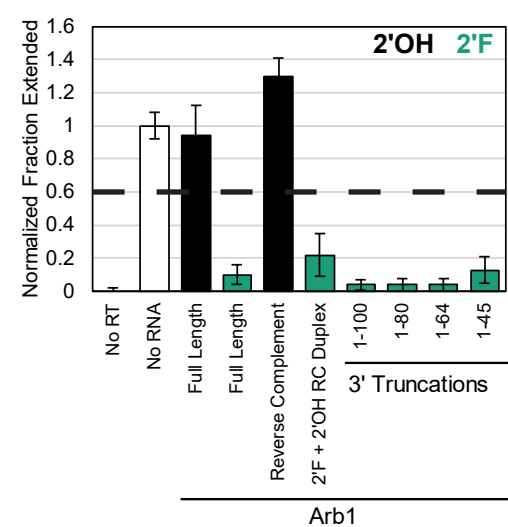

**Figure S5. RT inhibition by 2'-FY Versions of Alternative forms of Arb1.** Arbitrary RNA sequence 1 (Arb1) was converted into a duplex consisting of the 2'-FY RNA and its unmodified reverse complement. Additionally, 3' truncations of the 2'-FY version were generated that contained the indicated nucleotide segments and had similar ratios of pyrimidines to purines of 0.54, 0.55, 0.56, 0.50, and 0.47 for full-length, 100 nt, 80 nt, 64 nt, and 45 nt variants, respectively, and these variants were tested for RT inhibition using a primer extension assay (n = 4).
