# Supplementary material for: 2′-fluoro-modified pyrimidines enhance affinity of RNA oligonucleotides to HIV-1 reverse transcriptase
Source: PubMed Central journal article supplement — RNA. 2020 Nov;26(11):1667–79. doi: 10.1261/rna.077008.120 (PMC7566575; doi:10.1261/rna.077008.120), 2020-11
Supplement: supp_077008.120_Supplemental_Fig_S6.pdf [file supp_077008.120_Supplemental_Fig_S6.pdf]

**Figure S6**

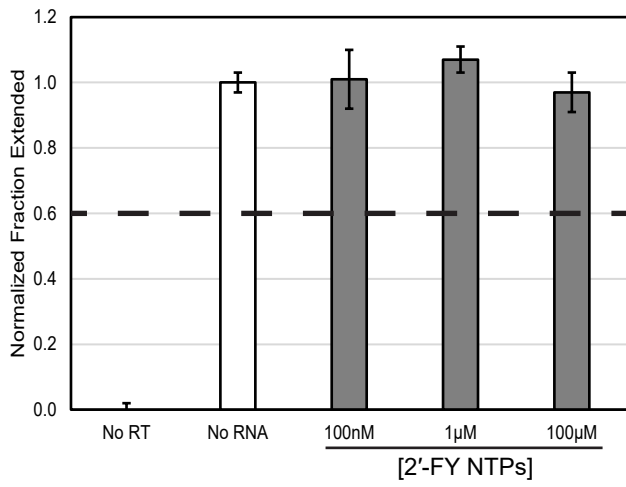

**Figure S6 No Effect of 2'-FY Nucleotide Triphosphates on RT Inhibition.** Quantification of primer extension assays showing fraction of primer converted into full-length product in control reactions in the absence of RT (No RT) or in the absence of RNA inhibitor (No RNA) and in reactions containing varying concentrations of 2'-FY nucleotide triphosphates (NTPs) (n = 4).
