# Supplementary material for: 2′-fluoro-modified pyrimidines enhance affinity of RNA oligonucleotides to HIV-1 reverse transcriptase
Source: PubMed Central journal article supplement — RNA. 2020 Nov;26(11):1667–79. doi: 10.1261/rna.077008.120 (PMC7566575; doi:10.1261/rna.077008.120), 2020-11
Supplement: supp_077008.120_Supplemental_Fig_S7.pdf [file supp_077008.120_Supplemental_Fig_S7.pdf]

**Figure S7**

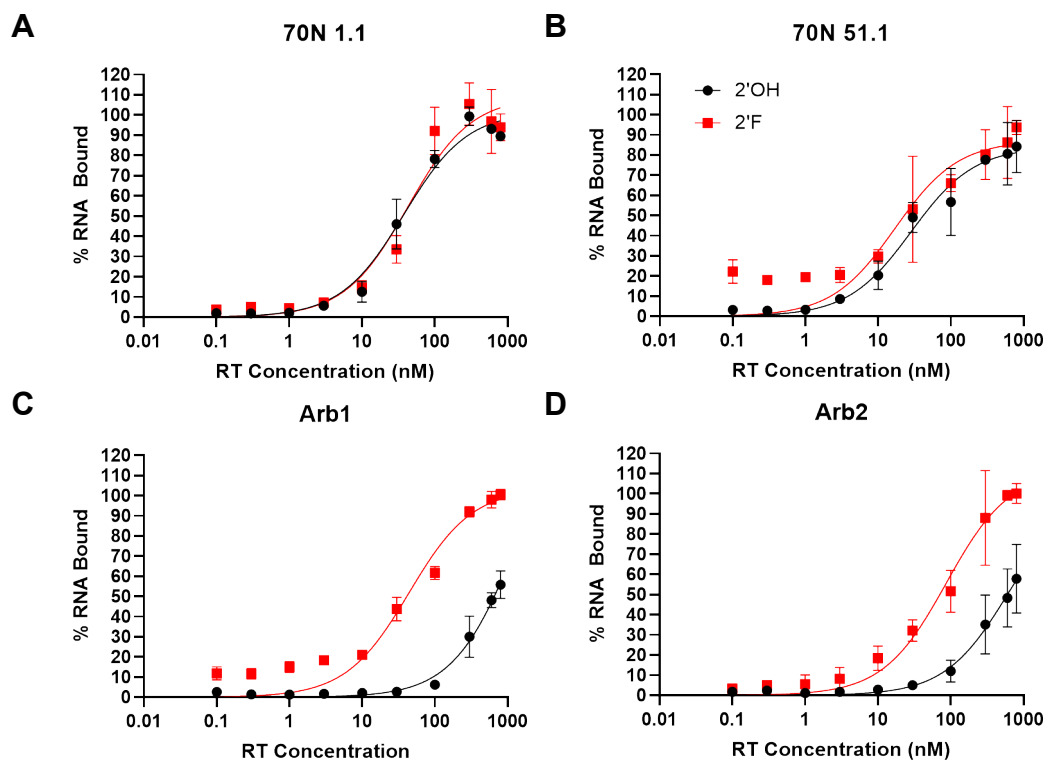

**Figure S7 Binding Curves of RNA Sequences to HXB2 RT.** Binding of (A) 70N 1.1, (B) 70N 51.1, (C) Arb1 control, and (D) Arb2 control to HXB2 RT was measured using a nitrocellulose filter binding assay (n = 3).
